# Supplementary material
Source: Springer Nature journal article supplement (https://www.springermedizin.de/resource/supplementary/13012_2012_591_MOESM4_ESM.docx/9630352)
Supplement: MOESM4 [file 9630352]

| **Countries** | **Prac-tices** | **Patients** | **Urban*** | **FTE**  GP ≥2** | **FTE ** nurse ≥2** | **Organisational practice scores** | | | |
| --- | --- | --- | --- | --- | --- | --- | --- | --- | --- |
| **Quality management***** | | **CVD care ****** | |
|  | N | N | % | % | % | Mean | SD (range) | Mean | SD (range) |
| Austria | 24 | 285 | 25.0 | 0.0 | 62.5 | 8.50 | 3.05 (3-13) | 4.46 | 2.93 (0-10) |
| Belgium | 24 | 266 | 9.1 | 50.0 | 0.0 | 8.36 | 3.35 (2-15 | 5.91 | 2.78 (2-13) |
| France | 29 | 377 | 21.4 | 50,0 | 0.0 | 7.32 | 2.84 (3-14) | 3.93 | 3.54 (0-14) |
| Germany | 26 | 470 | 16.7 | 22.2 | 61.1 | 9.05 | 2.07 (5-13) | 7.53 | 2.65 (3-13) |
| Netherlands | 34 | 467 | 35.3 | 23.5 | 3.2 | 9.91 | 2.63 (5-14) | 9.03 | 3.18 (4-16) |
| Slovenia | 36 | 842 | 25.0 | 51.6 | 53.3 | 7.06 | 3.22 (2-14) | 11.06 | 2.51 (7-17 |
| Spain | 36 | 652 | 41.7 | 97.2 | 100.0 | 10.67 | 1.33 (7-13) | 15.64 | 1.22 (13-17) |
| Switzerland | 22 | 329 | 0.0 | 5.9 | 17.6 | 4.29 | 2.63 (0-11) | 4.29 | 2.37 (1-9) |
| UK | 36 | 535 | 76.5 | 77.8 | 52.8 | 14.61 | 0.65 (13-15) | 15.31 | 1.14 (12-17) |
| Total | 267 | 4223 | 31.2 | 47.5 | 43.0 | 9.20 | 3.70 (0-15) | 9.37 | 5.11 (0-17) |
